# Overlapping and non-overlapping brain regions for theory of mind and self reflection in individual subjects

Rebecca Saxe, Joseph M. Moran, Jonathan Scholz, and John Gabrieli

Department of Brain and Cognitive Sciences, MIT, Cambridge, MA 02138, USA

**When subjects are required to reason about someone's false belief, a consistent pattern of brain regions are recruited including the medial prefrontal cortex, medial precuneus and bilateral temporo-parietal junction. Previous group analyses suggest that the two medial regions, but not the lateral regions, are also recruited when subjects engage in self-reflection. The current study directly compared the results of the 'false belief' and 'self' tasks in individual subjects. Consistent with previous reports, the medial prefrontal and medial precuneus regions recruited by the two tasks significantly overlap in individual subjects, although there was also evidence for non-overlapping voxels in medial regions. The temporo-parietal regions are only recruited for the 'theory of mind' task. Six possible models of the relationship between theory of mind, self-reflection and autobiographical memory, all consistent with both neurobiological and developmental evidence to date, are discussed.**

**Keywords:** theory of mind; self; fMRI; individual subjects; temporo-parietal junction; medial prefrontal cortex; precuneus

## INTRODUCTION

The classic task for assessing a child's ability to reason about the mental states of others (her 'theory of mind') is the False Belief task (Wimmer and Perner, 1983; for reviews of this literature, see Flavell, 1999; Wellman *et al.*, 2001). In the standard version of this task (the 'object transfer' problem), the child is told a story in which a character's belief about the location of a target object becomes false when the object is moved without the character's knowledge. The critical feature of a False Belief task is that to reach the correct answer, the child must pay attention to the character's belief, and not just to the actual location of the object (Dennett, 1978). Dozens of versions of the False Belief problem have been used, and while the precise age of success varies between children and between task versions (Wellman *et al.*, 2001); in general, children <3 or 4 years old do not correctly solve False Belief problems, but older children do.

Many neuroimaging studies have followed developmental psychology in using False Belief problems as the definitive Theory of Mind task (e.g. Fletcher *et al.*, 1995; Gallagher *et al.*, 2000; Vogeley *et al.*, 2001; Ruby and Decety, 2003; Saxe and Kanwisher, 2003). These studies have revealed an impressively consistent pattern of brain regions involved when subjects are required to reason about someone's false belief, including the medial prefrontal cortex (MPFC),

medial precuneus and bilateral temporo-parietal junction (left: LTPJ, right: RTPJ).

What is the distinct contribution of each of these regions to the subject's reasoning about other people? A series of recent results suggest that while the RTPJ is recruited specifically when subjects think about a character's thoughts, the medial precuneus and MPFC are recruited more generally for many different judgements about people (Bermphol, 2004; Mitchell *et al.*, 2005a, b; Saxe and Wexler, 2005; Northoff and Berphol, 2004; Saxe, 2006; Saxe and Powell, 2006). In particular, one line of research reliably reports higher response in both medial regions, but not in the lateral TPJ regions, when subjects judge whether a trait adjective applies to them ('self task'), than when subjects make semantic judgements about the same adjectives ('semantic task', Gusnard *et al.*, 2001; Kelley *et al.*, 2002; Macrae *et al.*, 2004; Schmitz *et al.*, 2004; see also D'Argembeau *et al.*, 2005; Goldberd *et al.*, 2006; Northoff *et al.*, 2006; Ochsner *et al.*, 2006). These results may provide (i) hints about the distinct contributions of the medial and lateral components of the 'theory of mind network' in the brain, (ii) a rare functional dissociation between brain regions that often activate, deactivate and even spontaneously fluctuate together (Greicius *et al.*, 2003) and (iii) impetus for cognitive psychologists to determine the common function underlying both 'false belief' and 'self-trait' attributions.

Each of these implications depends on a strong claim about the overlap between the 'false belief' and 'self' tasks in medial cortex: those similar-looking group activations are the result of recruitment in the very same regions of individual subjects for both tasks. However, group analyses in normalized brain-space produce blurred activation maps,

Received 10 August 2006; Accepted 27 August 2006

Thanks to Nancy Kanwisher for discussions and encouragement, and to Christina Triantafyllou, Steven Shannon and Sheeba Arnold for making the scanning possible. The fMRI resources used for this study were supported by the Athinoula A. Martinos Center for Biomedical Imaging at the McGovern Institute for Brain Research at MIT. J.G. was supported by the Simons Foundation.

Correspondence should be addressed to: Rebecca Saxe 46-4019 Department of Brain and Cognitive Sciences MIT, 43 Vassar St, Cambridge MA 02138, USA. E-mail: saxe@mit.edu.

due to the necessarily imperfect registration across physically different brains. Individuals vary not only in their physical anatomy but also in their functional anatomy, producing yet more blurring in group-averaged data. Thus, activations that may be completely non-overlapping within each individual could be highly overlapping when the same data are averaged across subjects. This problem is exacerbated when comparing activations across subject groups or across studies. In the current study, we therefore directly compared the results of the ‘false belief’ and ‘self’ tasks in individual subjects.

## METHODS

Eight naive, right-handed adults participated in the functional magnetic resonance imaging (fMRI) study for payment. All subjects were native English speakers, had normal or corrected-to-normal vision, and gave written informed consent in accordance with the requirements of internal review boards at MIT. Subjects were scanned using a Siemens Magnetom Tim Trio 3T system (Siemens Medical Solutions, Erlangen, Germany) in the Athinoula A. Martinos Imaging Center at the McGovern Institute for Brain Research at MIT, using thirty 4-mm-thick near-axial slices covering the whole cortex. Standard echoplanar imaging procedures were used (TR = 2 s, TE = 30 ms, flip angle = 90°).

In the theory of mind experiment, subjects read 24 short narratives about the formation of a representation (12 about beliefs, 12 about physical representations like a photo, drawing or map) that did not correspond to reality (Saxe and Kanwisher, 2003). Stories were on average 32 words long, and were presented for 10 s. Subjects then answered a fill-in-the-blank question either about the representation or about reality (presented for 4 s). Stories from the two conditions alternated, with a 12-s rest period after each story. Each run lasted 2 min and 48 s (six stories); each subject participated in four runs of this experiment.

During the self-attribution experiment subjects viewed a series of 200 trait adjectives presented across five functional runs. Words were drawn from Anderson’s (1968) list of normed trait adjectives, and lists were counterbalanced for word valence, length and number of syllables. Words were presented in a blocked design. Each word was presented for 3 s in blocks of ten. Prior to each block onset subjects viewed a 2-s cue screen describing their task for the upcoming block. Subjects either judged the words in the following block for their self-descriptiveness (‘Does this word apply to you?’) or for their valence (‘Is this word positive?’). Order of conditions was counterbalanced within and across subjects, and each block was followed by 10 s of rest. Each run lasted for 3 min and 4 s.

Stories and words were projected onto a screen via Matlab 5.0 running on an Apple G4 laptop computer, in white 24-point font on a black background. Because of technical errors, behavioral data were not collected in the scanner. However, extensive behavioral data on these stimuli are

available from previous studies (e.g. Kelley *et al.*, 2002; Saxe and Kanwisher, 2003; Macrae *et al.*, 2004).

The fMRI data were analyzed with SPM2 and in-house software. Individual subjects’ data were motion corrected, and then smoothed using a Gaussian filter (full width half maximum = 5 mm), and high-pass filtered during analysis. Both fMRI experiments used a blocked design and were modeled using a boxcar regressor.

All analyses were conducted in individual subjects. Voxels were labeled as ‘overlapping’ if the *t*-value for each contrast (false belief > false photograph) and (self > semantic), was independently greater than 3.6 ( $P < 0.001$ , uncorrected). Voxels were labeled as ‘non-overlapping’ if the *t*-value for one contrast exceeded 3.6, and the *t*-value of the other contrast was below 0.5. This low threshold reduced the chance of false positives inflating the observed non-overlap.

Theory of Mind regions of interest in each subject were defined as clusters of contiguous voxels with a higher BOLD response during ‘false belief’ than ‘false photo’ stories ( $P < 0.0001$ , uncorrected), within 9 mm of the peak voxel in anatomical areas implicated in theory of mind by previous studies: precuneus, MPFC and bilateral TPJ. Using the same threshold, we defined ROIs in the precuneus and MPFC, based on the response to the ‘self task’ vs the ‘semantic task’. The percent signal change over each block, relative to rest, was then estimated in each ROI for both tasks.

## RESULTS

The current design allowed us to ask two questions about the relationship between brain regions recruited for the ‘false belief’ and ‘self’ tasks. First, are there sub-regions significantly recruited for both tasks (i.e. is there any real overlap)? Second, are there sub-regions recruited significantly for one task, and not recruited for the other task (i.e. is there any real non-overlap)?

One approach to these questions is to examine the overlap and non-overlap between whole brain contrast maps for each task, in each individual subject. Regions of overlap between both contrasts were observed in the precuneus in 8/8 subjects (Figure 1a), and in MPFC in 6/8 subjects (Figure 1b), although note that regions of non-overlap were also observed. For each anatomical region of interest, for each subject, we calculated the total number of voxels recruited ( $P < 0.001$ ) for either task. We then calculated the proportion of this total activation that could be conservatively classified as overlapping (i.e.  $P < 0.001$  in both tasks), or non-overlapping (i.e.  $P < 0.001$  in one task, and  $P > 0.3$  in the other task, Figure 2). This profile differed significantly by region of interest (region by functional classification interaction  $F(6,36) = 3.4$ ,  $P < 0.01$ , no main effects). In the MPFC, voxels were most likely to be either recruited by both tasks or by the ‘self’ task only. In the precuneus, voxels were most likely to either recruited by both tasks or by the ‘theory of mind’ task only. In the TPJ bilaterally, voxels were most likely to be recruited only by the ‘theory of mind’ task.

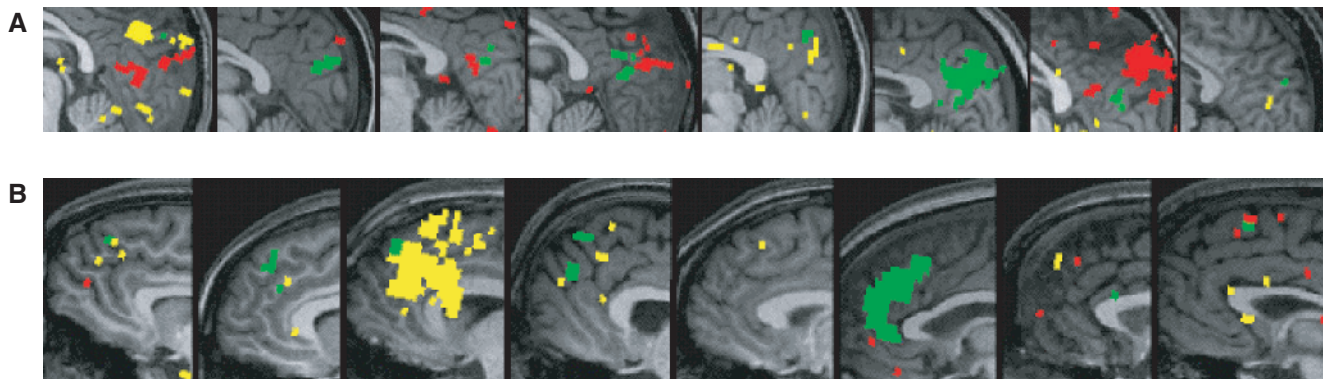

**Fig. 1** (A) Medial precuneus and (B) medial prefrontal cortex, in eight individual subjects, unnormalized, on individual subject anatomy. Voxels recruited for both False belief > False photo,  $t > 3.6$ , and Self > Semantic,  $t > 3.6$  are shown in green. Red voxels were recruited for False belief > False photo,  $t > 3.6$ , but not for Self > Semantic,  $t < 0.5$ . Yellow voxels were recruited for Self > Semantic,  $t > 3.6$ , but not for False belief > False photo,  $t < 0.5$ .

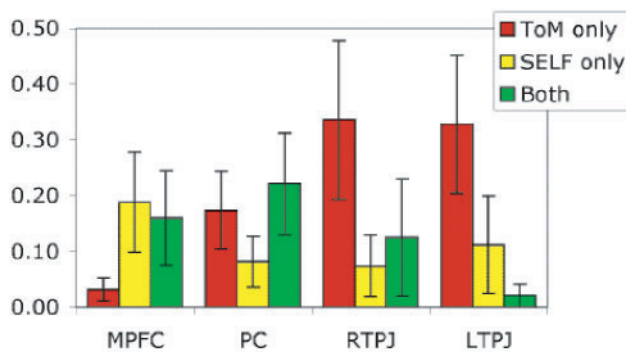

**Fig. 2** Average proportion of voxels in each region that were conservatively classified as overlapping (green), 'theory of mind' only (red) or 'self' only (yellow).

Another approach is to define functional regions of interest based on one contrast, and then evaluate the response in the same voxels, in the other task. Based on the theory of mind experiment, we found ROIs in the RTPJ (8/8 subjects), medial precuneus (8/8), MPFC (6/8) and LTPJ (4/8, too few for further analyses). In ROIs identified based on the theory of mind task, the response was higher during 'self' than 'semantic' judgements in the medial precuneus [ $t(7) = 3.1$ ,  $P < 0.02$ ] and MPFC [ $t(5) = 4.5$ ,  $P < 0.01$ ], but not in the RTPJ [ $t(7) = 1.3$ , NS, Figure 3]. Based on the self task, we found ROIs in the medial precuneus (8/8 subjects) and MPFC (7/8). In these ROIs, the response was higher during 'false belief vs 'false photograph' stories [precuneus:  $t(7) = 2.9$ ,  $P < 0.05$ ; mpfc:  $t(6) = 4.6$ ,  $P < 0.01$ , Figure 4).

## DISCUSSION

The current results are consistent with previous group analyses. Deciding whether a trait adjective applies to oneself recruit the medial regions associated with theory of mind—the medial precuneus and MPFC—but not the TPJ.

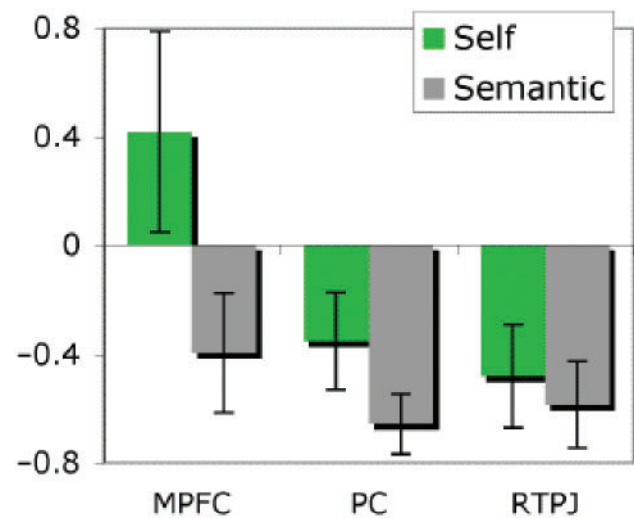

**Fig. 3** Percent signal change (relative to resting baseline) to Self and Semantic judgement in individual-subject functional regions of interest defined by False belief > False photograph stories. Bars show standard error.

Caution in interpreting the observed overlap is appropriate. These data do not completely overcome methodological limitations. First, a single voxel in the current study reflects the average response over  $3 \times 3 \times 4$  mm of tissue, much lower spatial resolution than the functional organization of cortex. Higher resolution functional imaging is currently becoming available, and may yet reveal that activations associated with the 'self' and 'false belief' tasks are neighboring but distinct (e.g. Schwarzlose *et al.*, 2005). Second, even within single voxels, neurons subserving distinct functions may be interspersed. One approach to disentangling such overlap is functional adaptation, which relies on the reduction of activity observed when two successive stimuli are processed by the same sub-population of neurons within a voxel, but not when the stimuli recruit different sub-populations (Kourtzi and Kanwisher, 2001;



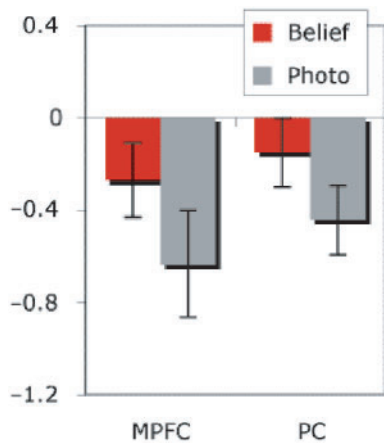

**Fig. 4** Percent signal change (relative to resting baseline) to False Belief and False Photograph stories in individual-subject functional regions of interest defined by Self > Semantic judgements. The temporo-parietal junction regions were not reliably recruited by the Self > Semantic contrast, so no functional regions of interest could be defined for these regions by this contrast. Bars show standard error.

Krekelberg *et al.*, 2006). Third, although overlapping voxels were observed in each individual, in most individuals we also observed non-overlapping voxels in medial regions, in which the  $t$ -value of one task was higher than 3.6, and the second task did not reach  $t > 0.5$  (corresponding to a  $P$ -value of 0.3). These non-overlapping voxels provide evidence that at least some aspects of the medial regions' contribution to theory of mind are not shared by the self-attribution task and vice versa.

Still, the current data provide the strongest evidence to date that sub-regions of medial precuneus and MPFC are recruited both when subjects reason about a character's thoughts, and when they attribute a personality trait to themselves. Recently, research has revealed a third cognitive function associated with very similar regions of medial cortex: autobiographical episodic memory (e.g. Shannon and Buckner, 2004; Wheeler and Buckner, 2004; Wagner *et al.*, 2005; Ries *et al.*, 2006; see also Fossati *et al.*, 2004; Lou *et al.*, 2004).

Interestingly, these same three tasks—theory of mind, self reflection and autobiographical episodic memory—are correlated in child development (Moore and Lemmon, 2001). One measure of self-reflection in childhood is Povinelli and colleagues' (1996) delayed self-recognition task. In this task, an experimenter is videotaped covertly placing a large sticker on the child's head. Three minutes later, the child is shown the video tape. Although all children between 2 and 4 years correctly identify themselves in the video, only children over 3.5 years reach up to retrieve the sticker. Performance on this task specifically reflects children's developing conception of the connection between their past and present selves; given a mirror, children at all these ages successfully retrieve the sticker. Children's performance on the delayed-self recognition task is

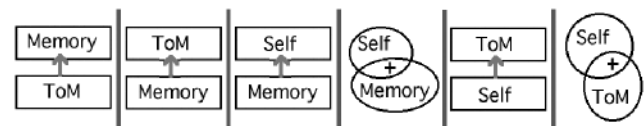

**Fig. 5** Six models of the relationships between theory of mind, autobiographical memory and self-reflection that are consistent with current data. Arrows depict causal or developmental dependence of the top box on the bottom box. The models are described further in the text.

correlated with scores on episodic memory and false belief tasks (Moore and Lemmon, 2001).

Developmental and neural data thus converge on a triad of interrelated tasks. The next challenge is to establish the causal and dependence relations between these tasks, and/or the common cognitive function(s) underlying them. Both careful studies of individual subjects' functional data, and careful task analyses, will be necessary. Many different models are consistent with the current evidence (Figure 5):

- (1) Autobiographical memory may depend on theory of mind. Perner (2001) has proposed that autobiographical/episodic memory inherently depends on theory of mind: that is, on the ability to identify the source of a current experience (a recollection) in the previously experienced event. Developmental evidence is consistent with such a dependence of autobiographical memory on theory of mind. Children's theory of the origin of epistemic states—that is, of how beliefs and knowledge are acquired or caused—develop along with performance on false belief tasks (Wimmer *et al.*, 1988; O'Neill *et al.*, 1992). Three year olds, for example, but not four year olds, expect that people (including themselves) can distinguish between a heavy ball and a light ball just as well by looking at the balls as by lifting them (Burr and Hofer, 2002). Success on tests of theory of mind predicts success on episodic memory tasks (Perner, 2001), and helps children become resistant to contamination of their autobiographical memories through suggestion (Welch-Ross, 1999).
- (2) Theory of mind may depend on autobiographical memory. Some theorists have suggested that in order to understand the causal relations between another person's experiences, thoughts, and behaviors, observers bring to mind specific, and relevantly similar, past experiences of their own (Adams, 2001). There is at least some evidence that empathy is affected by the observer's prior experiences (Batson *et al.*, 1996).
- (3) Self-reflection may depend on autobiographical memory. During the self-attribution task, subjects are asked to judge whether trait words ('logical', 'reckless', 'rebellious') apply to themselves. To answer this question, subjects may retrieve autobiographical memories of specific incidents in which their actions merited (or did not merit) the target description.

- (4) Autobiographical memory and self-reflection may both depend on recognizing the self as an enduring entity, with persisting causal and social properties (Povinelli and Simon, 1998). Povinelli (2001) therefore proposed that delayed self-recognition is a necessary precursor to autobiographical memory.
- (5) Theory of mind may depend on self-reflection. ‘Simulation Theory’ proposes that an observer attributes mental states to another person by using her own mind as a model of the other mind (e.g. Gallese and Goldman, 2004; but see Saxe, 2006). The observer would adjust (i) the input, using the other person’s (hypothesized) perceptual environment, rather than her own and (ii) the output, generating a prediction rather than an action (Nichols and Stich, 2003). Identifying the output as a prediction for someone else’s action might involve a kind of self-attribution, and be a necessary component of theory of mind.
- (6) Theory of mind and self-trait attribution may share a common conception of human agents as enduring entities, with persisting causal and social properties. This distinction lies at the core of recent proposals that there is a general domain of ‘social cognition’, distinct from all forms of ‘non-social cognition’ (Jenkins and Mitchell, in press; Mitchell *et al.*, 2005b).

One further observation may illuminate (or complicate) this picture: patients with Alzheimer’s disease show amyloid deposition, hypo-metabolism, hypo-activation and tissue atrophy in these midline regions (Greicius *et al.*, 2004; Shannon and Buckner, 2004; Buckner *et al.*, 2005; Rombouts *et al.*, 2005; Wang *et al.*, 2006). This pattern converges with the evidence that medial precuneus and MPFC are involved in autobiographical memory, which is impaired in Alzheimer’s disease. However, performance on false belief tasks is preserved in patients with Alzheimer’s disease (Gregory *et al.*, 2002; Zaitchik *et al.*, 2004; Zaitchik *et al.*, 2006), and there is also evidence for preserved self-attribution of traits (Klein *et al.*, 2003; Cotrell and Hooker, 2005; Rankin *et al.*, 2005). In contrast, both theory of mind and self-attribution task performance is impaired in a different degenerative disorder, fronto-temporal dementia (Gregory *et al.*, 2002; Rankin *et al.*, 2005). One study recently directly compared recruitment of the medial precuneus regions for autobiographical memory and for self-trait attribution in healthy subjects and in patients with mild cognitive impairment (MCI), a risk factor for Alzheimer’s disease. MCI patient showed hypo-activation of the medial precuneus and MPFC for the memory task but normal activation for the self-trait attribution (Ries *et al.*, 2006). Thus while theory of mind, self-attribution and episodic memory are correlated in development, and recruit common brain regions in healthy adults, the three tasks appear to be dissociable in degenerative disease. Any full account of the role of the medial precuneus and MPFC should aim to explain all of these results.

### Conflict of Interest

None declared.

### REFERENCES

- Adams, F. (2001). Empathy, neural imaging and the theory versus simulation debate. *Mind & Language*, 16, 368–92.
- Anderson, N.H. (1968). Likableness ratings of 555 personality trait words. *Journal of Personality and Social Psychology*, 9, 272.
- Batson, C.D., Sympson, S.C., Hindman, J.L., et al. (1996). “I’ve been there, too”: Effect on empathy of prior experience with a need. *Personality & Social Psychology Bulletin*, 22, 474–82.
- Buckner, R.L., Snyder, A.Z., Shannon, B.J., et al. (2005). Molecular, structural, and functional characterization of Alzheimer. *Journal of Neuroscience*, 25, 7709–17.
- Burr, J.E., Hofer, B.K. (2002). Personal epistemology and theory of mind: deciphering young children. *New Ideas in Psychology*, 20, 199–224.
- Cotrell, V., Hooker, K. (2005). Possible selves of individuals with Alzheimer. *Psychology and Aging*, 20, 285–94.
- D’Argebeau, A., Collette, F., Van der Linden, M., et al. (2005). Self-referential reflective activity and its relationship with rest: a PET study. *Neuroimage*, 25, 616–24.
- Dennett, D. (1978). Beliefs about beliefs. *Behavioural and Brain Sciences*, 1, 568–7.
- Flavell, J.H., Green, F.L. (1999). Development of intuitions about the controllability of different mental states. *Cognitive Development*, 14, 133–146.
- Fletcher, P.C., Happé, F., Frith, U., Backer, S.C., Dolan, R.J. (1995). Other minds in the brain: a functional imaging study of ‘theory of mind’ in story comprehension. *Cognition*, 57, 109–28.
- Fossati, P., Hevenor, S.J., Lepage, M., et al. (2004). Distributed self in episodic memory: neural correlates of successful retrieval of self-encoded positive and negative personality traits. *Neuroimage*, 22, 1596–604.
- Gallagher, H.L., Happé, F., Brunswick, N., et al. (2000). Reading the mind in cartoons and stories: an fMRI study of ‘theory of mind’ in verbal and nonverbal tasks. *Neuropsychologia*, 38, 11–21.
- Gallese, V., Goldman, A. (1998). Mirror neurons and the simulation theory of mind-reading. *Trends in Cognitive Sciences*, 2, 493–501.
- Goldberg, I.I., Harel, M., Malach, R. (2006). When the brain loses its self: prefrontal inactivation during sensorimotor processing. *Neuron*, 50, 329–39.
- Gregory, C., Lough, S., Stone, V., et al. (2002). Theory of mind in patients with frontal variant frontotemporal dementia and Alzheimer. *Brain*, 125(Pt 4):752–64.
- Greicius, M.D., Krasnow, B., Reiss, A.L., Menon, V. (2003) Functional connectivity in the resting brain: a network analysis of the default mode hypothesis. *Proceedings of the National Academy of Sciences of the United States of America*, 100, 253–8.
- Greicius, M.D., Srivastava, G., Reiss, A.L., Menon, V. (2004). Default-mode network activity distinguishes Alzheimer’s disease from healthy aging: evidence from functional MRI. *Proceedings of the National Academy of Sciences of the United States of America*, 101, 4637–42.
- Gusnard, D., Akbudak, E., Shulman, G., Raichle, M.E. (2001). Role of medial prefrontal cortex in a default mode of brain function. *NeuroImage*, 13 (Supplement 1), 414.
- Jenkins, A.C., Mitchell, J.P. (in press). How has cognitive neuroscience contributed to social psychological theory?. In: Todorov, A., Fiske, S.T., Prentice, D., editors. *Social Neuroscience: Toward Understanding the Underpinnings of the Social Mind*. Oxford University Press.
- Kelley, W.M., Macrae, C.N., Wyland, C.L., Caglar, S., Inati, S., Heatherton, T.F. (2002). Finding the self? An event-related fMRI study. *Journal of Cognitive Neuroscience*, 14, 785–94.
- Klein, S., Cosmides, L., Costabile, K. (2003). Preserved knowledge of self in a case of Alzheimer. *Social Cognition*, 21, 157–65.
- Krekelberg, B., Boynton, G.M., van Wessel, R.J. (2006). Adaptation: from single cells to BOLD signals. *Trends in Neurosciences*, 29, 250–6.

- Kourtzi, Z., Kanwisher, N. (2001). Representation of perceived object shape by the human lateral occipital complex. *Science*, 293, 1506–9.
- Lou, H.C., Luber, B., Crupain, M., et al. (2004). Parietal cortex and representation of the mental self. *Proceedings of the National Academy of Sciences of the United States of America*, 101, 6827–32.
- Lundstrom, B.N., Ingvar, M., Petersson, K.M. (2005). The role of precuneus and left inferior frontal cortex during source memory episodic retrieval. *Neuroimage*, 27, 824–34.
- Lundstrom, B.N., Petersson, K.M., Andersson, J., Johansson, M., Fransson, P., Ingvar, M. (2003). Isolating the retrieval of imagined pictures during episodic memory: activation of the left precuneus and left prefrontal cortex. *Neuroimage*, 20, 1934–43.
- Macrae, C.N., Moran, J.M., Heatherton, T.F., Banfield, J.F., Kelley, W.M. (2004). Medial prefrontal activity predicts memory for self. *Cereb Cortex*, 14, 647–54.
- Mitchell, J.P., Banaji, M.R., Macrae, C.N. (2005a). The link between social cognition and self-referential thought in the medial prefrontal cortex. *Journal of Cognitive Neuroscience*, 17, 1306–15.
- Mitchell, J.P., Macrae, C.N., Banaji, M.R. (2005b). Forming impressions of people versus inanimate objects: social-cognitive processing in the medial prefrontal cortex. *Neuroimage*, 15, 26, 251–7.
- Moore, C., Lemmon, K. (2001). *Self in Time: Developmental Perspectives*. Mahwah, NJ: Lawrence Erlbaum Associates, Inc.
- Nichols, S., Stich, S. (2003). *Mindreading: An Integrated Account of Pretence, Self-awareness, and Understanding of Other Minds*. Oxford University Press.
- Northoff, G., Bermphol, F. (2004). Cortical midline structures and the self. *Trends in Cognitive Science*, 8, 102–7.
- Northoff, G., Heinzel, A., de Greck, M., Bermphol, F., Dobrowolny, H., Panksepp, J. (2006). Self-referential processing in our brain—a meta-analysis of imaging studies on the self. *Neuroimage*, 31, 440–57.
- Ochsner, K.N., Beer, J.S., Robertson, E.R., et al. (2005). The neural correlates of direct and reflected self-knowledge. *Neuroimage*, 28, 797–814.
- O'Neill, D., Astington, J.W., Flavell, J. (1992). Young children's understanding of the role that sensory experiences play in knowledge acquisition. *Child Development*, 63, 474–91.
- Perner, J. (2001). Episodic memory: essential distinctions and developmental implications. In: Moore, C., Lemmon, K.P., editors. *Self in Time: Developmental Perspectives*. Mahwah, NJ: Lawrence Erlbaum Associates Inc, pp. 181–202.
- Povinelli, D.J. (2001). The Self: Elevated in Consciousness and Extended in Time. In: Moore, C., Lemmon, K.P., editors. *Self in Time: Developmental Perspectives*. Mahwah, NJ: Lawrence Erlbaum Associates Inc, pp. 75–95.
- Povinelli, D.J., Landau, K.R., Perilloux, H.K. (1996). Self-recognition in young children using delayed versus live feedback: evidence of a developmental asynchrony. *Child Development*, 67, 1540–54.
- Povinelli, D.J., Simon, B.B. (1998). Young children. *Developmental Psychology*, 34, 188–94.
- Rankin, K.P., Baldwin, E., Pace-Savitsky, C., Kramer, J.H., Miller, B.L. (2005). Self awareness and personality change in dementia. *Journal of Neurology, Neurosurgery and Psychiatry*, 76, 632–9.
- Ries, M.L., Schmitz, T.W., Kawahara, T.N., Torgerson, B.M., Trivedi, M.A., Johnson, S.C. (2006). Task-dependent posterior cingulate activation in mild cognitive impairment. *Neuroimage*, 29, 485–92.
- Rombouts, S.A., Barkhof, F., Goekoop, R., Stam, C.J., Scheltens, P. (2005). Altered resting state networks in mild cognitive impairment and mild Alzheimer. *Human Brain Mapping*, 26, 231–9.
- Ruby, P., Decety, J. (2003). What you believe versus what you think they believe: a neuroimaging study of conceptual perspective-taking. *European Journal of Neuroscience*, 17, 2475–80.
- Saxe, R. (2006). Uniquely human social cognition. *Current Opinion in Neurobiology*, 16, 235–9.
- Saxe, R., Kanwisher, N. (2003). People thinking about thinking people: fMRI studies of Theory of Mind. *Neuroimage*, 19, 1835–42.
- Saxe, R., Powell, L. (2006). It. *Psychological Science*, 17, 692–9.
- Saxe, R., Wexler, A. (2005). Making sense of another mind: the role of the right temporo-parietal junction. *Neuropsychologia*, 43, 1391–9.
- Schwarzlose, R.F., Baker, C.L., Kanwisher, N. (2005). Separate face and body selectivity on the fusiform gyrus. *Journal of Neuroscience*, 23, 11055–9.
- Shannon, B.J., Buckner, R.L. (2004). Functional-anatomic correlates of memory retrieval that suggest nontraditional processing roles for multiple distinct regions within posterior parietal cortex. *Journal of Neuroscience*, 24, 10084–92.
- Vogel, K., Bussfeld, P., Newen, A., et al. (2001). Mind reading: neural mechanisms of theory of mind and self-perspective. *Neuroimage*, 14, 170–81.
- Wagner, A.D., Shannon, B.J., Kahn, I., Buckner, R.L. (2005). Parietal lobe contributions to episodic memory retrieval. *Trends in Cognitive Science*, 9, 445–53.
- Wang, L., Zang, Y., He, Y., et al. (2006). Changes in hippocampal connectivity in the early stages of Alzheimer. *Neuroimage*, 31, 496–504.
- Welch-Ross, M.K. (1999). Preschoolers' understanding of mind: implications for suggestibility. *Cognitive Development*, 14, 101–32.
- Wellman, H.M., Cross, D., Watson, J. (2001). Meta-analysis of theory-of-mind development: the truth about false belief. *Child Development*, 72, 655–84.
- Wheeler, M.E., Buckner, R.L. (2004). Functional-anatomic correlates of remembering and knowing. *Neuroimage*, 21, 1337–49.
- Wimmer, H., Gruber, S., Perner, J. (1984). Young children's conception of lying: Lexical realism-Moral subjectivism. *Journal of Experimental Child Psychology*, 37, 1–30.
- Wimmer, H., Perner, J. (1983). Beliefs about beliefs: representation and constraining function of wrong beliefs in young children. *Cognition*, 13, 103–28.
- Wimmer, H., Weichbold, V. (1994). Children's theory of mind: Fodor's heuristics examined. *Cognition*, 53, 45–57.
- Zaitchik, D., Koff, E., Brownell, H., Winner, E., Albert, M. (2004). Inference of mental states in patients with Alzheimer. *Cognitive Neuropsychiatry*, 9, 301–13.
- Zaitchik, D., Koff, E., Brownell, H., Winner, E., Albert, M. (2006). Inference of beliefs and emotions in patients with Alzheimer. *Neuropsychology*, 20, 11–20.
